# Supplementary material
Source: PubMed Central journal article supplement (PMC5408936)
Supplement: NIHMS72511-supplement-Supplemental_Material.pdf [file NIHMS72511-supplement-Supplemental_Material.pdf]

## Supplementary Materials

### First trimester maternal protein intake and childhood kidney outcomes.

#### The Generation R Study

Kozeta Miliku MD<sup>1,2,3</sup>, Trudy Voortman MSc<sup>1,2</sup>, Edith H. van den Hooven PhD<sup>1,2</sup>, Albert Hofman, MD, PhD<sup>2</sup>, Oscar H. Franco, MD, PhD<sup>2</sup>, Vincent W.V. Jaddoe MD, PhD\*<sup>1,2,3</sup>

1. The Generation R Study Group, Erasmus University Medical Center, Rotterdam, the Netherlands
2. Department of Epidemiology, Erasmus University Medical Center, Rotterdam, the Netherlands
3. Department of Pediatrics, Erasmus University Medical Center, Rotterdam, the Netherlands

**Supplementary Table 1.** Subjects characteristics in the observed and imputed dataset (N=3,650)

**Supplementary Table 2.** Associations of maternal protein intake during pregnancy with childhood creatinine and cystatin C blood levels (N=2,500)

**Supplementary Table 3.** Associations of maternal protein intake during pregnancy with childhood kidney outcomes, additionally adjusted for child protein intake at the age of 1 year (N=2,193)

**Supplementary Table 4.** Crude and multivariable adjusted associations of maternal protein intake during pregnancy with childhood kidney outcomes, in Dutch mothers only (N=2,332)

**Supplementary Table 1. Observed and imputed subjects characteristics (n = 3,650)**

|                                                            | Observed          | Imputed           |
|------------------------------------------------------------|-------------------|-------------------|
| <b>Maternal characteristics</b>                            |                   |                   |
| Maternal age (y)                                           | 31.1 (4.7)        | 31.1 (4.7)        |
| Gestational age at intake (weeks)                          | 13.8 (9.8, 23.5)  | 13.5 (9.8, 22.9)  |
| Maternal body mass index at enrolment (kg/m <sup>2</sup> ) | 22.5 (18.3, 34.2) | 22.6 (18.4, 34.4) |
| <i>Missing, (%)</i>                                        | 15.3              |                   |
| Nulliparous (%)                                            | 59.5              | 59.4              |
| <i>Missing, (%)</i>                                        | 0.2               |                   |
| Educational level, (%)                                     |                   |                   |
| - No higher education                                      | 44.4              | 44.9              |
| - Higher education                                         | 55.6              | 55.1              |
| <i>Missing, (%)</i>                                        | 2.7               |                   |
| Ethnicity (%)                                              |                   |                   |
| - Dutch                                                    | 64.3              | 63.9              |
| - Turkish                                                  | 5.0               | 5.0               |
| - Moroccan                                                 | 3.5               | 3.5               |
| - Surinamese or Dutch Antilles                             | 7.9               | 7.8               |
| - Other western                                            | 12.5              | 12.5              |
| - Other non-western                                        | 6.7               | 6.7               |
| <i>Missing, (%)</i>                                        | 0.6               |                   |
| Household total income, (%)                                |                   |                   |
| - < 1400 euro                                              | 14.8              | 13.4              |
| - 1400-2200 euro                                           | 18.3              | 14.5              |
| - > 2200 euro                                              | 66.9              | 60.7              |
| <i>Missing, %</i>                                          | 9.3               |                   |
| Smoking during pregnancy, (%)                              |                   |                   |
| - Never smoked                                             | 76.2              | 76.0              |
| - until pregnancy was known                                | 9.7               | 9.6               |
| - Continued                                                | 14.1              | 14.2              |
| <i>Missing, (%)</i>                                        | 9                 |                   |
| Alcohol during pregnancy, (%)                              |                   |                   |
| - Never alcohol in pregnancy                               | 38.1              | 37.9              |
| - Until pregnancy was known                                | 14.5              | 14.5              |
| - Continued                                                | 47.4              | 47.3              |
| <i>Missing, (%)</i>                                        | 9.8               |                   |
| Folic acid supplement use, (%)                             |                   |                   |
| - No                                                       | 17.4              | 22.4              |
| - Start 1st to 10 weeks                                    | 31.9              | 31.1              |
| - Start periconceptional                                   | 50.7              | 45.8              |
| <i>Missing, (%)</i>                                        | 20.8              |                   |
| Prepregnancy comorbidities (%)                             | 1.6               | NI                |
| <i>Missing, (%)</i>                                        | 28.7              |                   |

|                                            |                   |                   |
|--------------------------------------------|-------------------|-------------------|
| <b>Maternal diet</b>                       |                   |                   |
| Total energy intake (kcal)                 | 2,073 (543)       | NI                |
| Protein (g/d) <sup>1</sup>                 |                   |                   |
| - Total                                    | 76.6 (20.4)       | NI                |
| - Animal                                   | 46.9 (15.4)       | NI                |
| - Vegetable                                | 29.9 (9.2)        | NI                |
| Protein (E%)                               | 15.0 (2.5)        | NI                |
| Carbohydrates (E%)                         | 48.5 (6.3)        | NI                |
| Fat (E%)                                   | 36.3 (5.5)        | NI                |
| Missing, %                                 | -                 |                   |
| <b>Infant characteristics</b>              |                   |                   |
| Girls, (%)                                 | 50.1              | NI                |
| Dutch ethnicity (%)                        | 66.2              | 65.8              |
| Missing, (%)                               | 0.5               |                   |
| Gestational age at birth (wk)              | 40.1 (36.1, 42.4) | 40.1 (36.1, 42.4) |
| Missing, (%)                               | -                 |                   |
| Birth weight, (g)                          | 3,469 (538)       | 3,469 (538)       |
| Missing, (%)                               | 0.02              |                   |
| Breastfeeding (%)                          |                   |                   |
| - Exclusive $\geq$ 4 months                | 25.7              | 25.5              |
| - Partial $\geq$ 4 months                  | 65.5              | 64.7              |
| - Never or $\leq$ 4 months                 | 8.8               | 9.9               |
| Missing, (%)                               | 15.8              |                   |
| Child protein intake at 1 y (g/d)          | 26.6 (29.6)       | NI                |
| Missing, (%)                               | 39.9              |                   |
| <b>Child characteristics at 6 y visit</b>  |                   |                   |
| Age (years)                                | 6.1 (5.6 - 7.3)   | NI                |
| Height (cm)                                | 119.1 (5.6)       | 119.1 (5.6)       |
| Missing, %                                 | 0.2               |                   |
| Weight (kg)                                | 22.9 (3.8)        | 22.9 (3.8)        |
| Missing, (%)                               | 0.2               |                   |
| Body mass index, (kg/m <sup>2</sup> )      | 16.1 (1.7)        | 16.1 (1.7)        |
| Missing, (%)                               | 0.2               |                   |
| Body surface area, (m <sup>2</sup> )       | 0.90 (0.08)       | 0.90 (0.08)       |
| Missing, (%)                               | 0.2               |                   |
| Screen time (hour/day)                     | 1.3 (0.3, 4.7)    | 1.3 (0.3, 4.6)    |
| Missing, (%)                               | 20.1              |                   |
| Kidney volume combined, (cm <sup>3</sup> ) | 119 (23)          | NI                |
| Missing, (%)                               | 8.4               |                   |
| Creatinine, ( $\mu$ mol/l)                 | 37.1 (5.4)        | NI                |
| Missing, %                                 | 31.5              |                   |
| Cystatin C ( $\mu$ g/l)                    | 784 (83)          | NI                |
| Missing, %                                 | 31.5              |                   |
| eGFR, (ml/min/1.73m <sup>2</sup> )         | 120 (16)          | NI                |
| Missing, (%)                               | 31.7              |                   |
| eGFR, (ml/min/1.73m <sup>2</sup> )         | 103 (15)          | NI                |
| Missing, (%)                               | 31.5              |                   |
| Microalbuminuria, (%)                      | 7.2               | NI                |

---

Values are means (SD), percentages (%), or medians (95% range) for variables with skewed distribution. Abbreviations: eGFR<sub>creat</sub>, estimated glomerular filtration rate based on creatinine levels; eGFR<sub>cyst C</sub>, estimated glomerular filtration rate based on cystatin C levels. <sup>1</sup> unadjusted for energy intake. NI - not imputed. In the observed dataset, percentages are valid percentage.

**Supplementary Table 2. Associations of maternal protein intake during pregnancy with childhood creatinine and cystatin C <sup>1</sup>**

|                                           | Serum creatinine<br>( $\mu\text{mol/l}$ )<br>n = 2,500      | Serum creatinine<br>( $\mu\text{mol/l}$ )<br>adjusted for children protein<br>intake at the age of 1 year<br>n = 1,205 | Serum cystatin C<br>( $\mu\text{g/l}$ )<br>n = 2,500 | Serum cystatin C<br>( $\mu\text{g/l}$ )<br>adjusted for children<br>protein intake at the age of<br>1 year<br>n = 1,206 |
|-------------------------------------------|-------------------------------------------------------------|------------------------------------------------------------------------------------------------------------------------|------------------------------------------------------|-------------------------------------------------------------------------------------------------------------------------|
| Total protein intake (g) <sup>2</sup>     | - <b>0.02</b> (- <b>0.04</b> , - <b>0.01</b> ) <sup>3</sup> | - <b>0.03</b> (- <b>0.05</b> , - <b>0.01</b> ) <sup>3</sup>                                                            | - 0.12 (- 0.41, 0.17)                                | - 0.03 (- 0.46, 0.39)                                                                                                   |
| Animal protein intake (g) <sup>2</sup>    | - 0.01 (- 0.03, 0.004)                                      | - <b>0.03</b> (- <b>0.06</b> , - <b>0.01</b> ) <sup>3</sup>                                                            | - 0.13 (- 0.42, 0.16)                                | - 0.11 (- 0.49, 0.27)                                                                                                   |
| Vegetable protein intake (g) <sup>2</sup> | - <b>0.07</b> (- <b>0.11</b> , - <b>0.03</b> ) <sup>3</sup> | - <b>0.08</b> (- <b>0.13</b> , - <b>0.03</b> ) <sup>3</sup>                                                            | 0.05 (- 0.60, 0.69)                                  | 0.14 (- 0.68, 0.45)                                                                                                     |

<sup>1</sup>Values are based on multivariable linear or logistic regression models and reflect differences or odds ratios and 95% confidence intervals in kidney volume and function measures for an increase in protein intake (g/d). The model is adjusted for child's sex, age at 6 year visit, maternal characteristics (age, body mass index before pregnancy, weight gain during pregnancy, gestational age at intake), maternal lifestyle (alcohol consumption, smoking during pregnancy, folic acid intake during pregnancy), socio-demographic factors (ethnicity, education), prepregnancy comorbidities, and child characteristics (breastfeeding, birthweight adjusted for gestational age, body surface area, and screen time at the age of 6y, child protein intake at 1 year). Models with animal protein intake were additionally adjusted for vegetable protein intake and vice versa. Protein intake is used as continuous variable in the regression models. <sup>2</sup>Protein intakes are energy-adjusted using the nutrient residual method. <sup>3</sup>p < 0.05. Abbreviations: eGFR<sub>creat</sub>, estimated glomerular filtration rate based on creatinine levels; eGFR<sub>cyst C</sub>, estimated glomerular filtration rate based on cystatin C levels.

**Supplementary Table 3. Associations of maternal protein intake during pregnancy with childhood kidney outcomes, additionally adjusted for child protein intake at the age of 1 year (N = 2,193)<sup>1</sup>**

|                                           | <b>Kidney volume</b><br><b>Difference (95% Confidence Interval) in cm<sup>3</sup></b><br><b>n = 1,603</b> | <b>eGFR<sub>creat</sub></b><br><b>Difference (95% Confidence Interval) in ml/min/1.73 m<sup>2</sup></b><br><b>n = 1,204</b> | <b>eGFR<sub>cyst C</sub></b><br><b>Difference (95% Confidence Interval) in ml/min/1.73 m<sup>2</sup></b><br><b>n = 1,206</b> | <b>Microalbuminuria</b><br><b>Odds ratio (95% Confidence Interval)</b><br><b>n = 1,713</b> |
|-------------------------------------------|-----------------------------------------------------------------------------------------------------------|-----------------------------------------------------------------------------------------------------------------------------|------------------------------------------------------------------------------------------------------------------------------|--------------------------------------------------------------------------------------------|
| Total protein intake (g) <sup>2</sup>     | 0.03 (-0.06, 0.11)                                                                                        | <b>0.11 (0.02, 0.19)<sup>3</sup></b>                                                                                        | 0.02 (-0.06, 0.09)                                                                                                           | 1.00 (0.98, 1.02)                                                                          |
| Animal protein intake (g) <sup>2</sup>    | 0.04 (-0.03, 0.12)                                                                                        | <b>0.12 (0.05, 0.20)<sup>3</sup></b>                                                                                        | 0.02 (-0.05, 0.10)                                                                                                           | 1.00 (0.99, 1.02)                                                                          |
| Vegetable protein intake (g) <sup>2</sup> | -0.01 (-0.17, 0.16)                                                                                       | <b>0.30 (0.13, 0.45)<sup>3</sup></b>                                                                                        | 0.001 (-0.17, 0.17)                                                                                                          | 1.00 (0.99, 1.03)                                                                          |

<sup>1</sup>Values are based on multivariable linear or logistic regression models and reflect differences or odds ratios and 95% confidence intervals in kidney volume and function measures for an increase in protein intake (g/d). The model is adjusted for child's sex, age at 6 year visit, maternal characteristics (age, body mass index before pregnancy, weight gain during pregnancy, gestational age at intake), maternal lifestyle (alcohol consumption, smoking during pregnancy, folic acid intake during pregnancy), socio-demographic factors (ethnicity, education), pre-pregnancy comorbidities, and child characteristics (breastfeeding, birthweight adjusted for gestational age, body surface area, and screen time at the age of 6y, child protein intake at 1 year). Models with animal protein intake were additionally adjusted for vegetable protein intake and vice versa. Protein intake is used as continuous variable in the regression models. <sup>2</sup>Protein intakes are energy-adjusted using the nutrient residual method. <sup>3</sup>p < 0.05. Abbreviations: eGFR<sub>creat</sub>, estimated glomerular filtration rate based on creatinine levels; eGFR<sub>cyst C</sub>, estimated glomerular filtration rate based on cystatin C levels.

**Supplementary Table 4. Crude and multivariable adjusted associations of maternal protein intake during pregnancy with childhood kidney outcomes, in Dutch mothers only (N = 2,332)**

|                                                 | <b>Kidney volume</b>                                                        | <b>Serum creatinine</b>                                             | <b>Serum cystatin C</b>                                           | <b>eGFR<sub>creat</sub></b>                                                           | <b>eGFR<sub>cyst C</sub></b>                                                          | <b>Microalbuminuria</b>                                   |
|-------------------------------------------------|-----------------------------------------------------------------------------|---------------------------------------------------------------------|-------------------------------------------------------------------|---------------------------------------------------------------------------------------|---------------------------------------------------------------------------------------|-----------------------------------------------------------|
|                                                 | <b>Difference (95% Confidence Interval) in cm<sup>3</sup><br/>n = 2,137</b> | <b>Difference (95% Confidence Interval) in μmol/l<br/>n = 1,601</b> | <b>Difference (95% Confidence Interval) in μg/l<br/>n = 1,602</b> | <b>Difference (95% Confidence Interval) in ml/min/1.73m<sup>2</sup><br/>n = 1,597</b> | <b>Difference (95% Confidence Interval) in ml/min/1.73m<sup>2</sup><br/>n = 1,602</b> | <b>Odds ratio (95% Confidence Interval)<br/>n = 2,233</b> |
| <b>Basic model<sup>1</sup></b>                  |                                                                             |                                                                     |                                                                   |                                                                                       |                                                                                       |                                                           |
| Total protein intake (g) <sup>3</sup>           | <b>0.08 (0.004, 0.17)<sup>4</sup></b>                                       | <b>-0.04 (-0.06, -0.01)<sup>4</sup></b>                             | -0.36 (-0.72, 0.01)                                               | <b>0.13 (0.06, 0.19)<sup>4</sup></b>                                                  | <b>0.08 (0.01, 0.15)<sup>4</sup></b>                                                  | 1.00 (0.98, 1.02)                                         |
| Animal protein intake (g) <sup>3</sup>          | <b>0.08 (0.001, 0.17)<sup>4</sup></b>                                       | <b>-0.03 (-0.05, -0.007)<sup>4</sup></b>                            | -0.37 (-0.74, 0.01)                                               | <b>0.11 (0.04, 0.18)<sup>4</sup></b>                                                  | <b>0.08 (0.01, 0.15)<sup>4</sup></b>                                                  | 1.00 (0.99, 1.02)                                         |
| Vegetable protein intake (g) <sup>3</sup>       | 0.09 (-0.09, 0.26)                                                          | <b>-0.07 (-0.12, -0.02)<sup>4</sup></b>                             | -0.21 (-0.98, 0.56)                                               | <b>0.22 (0.07, 0.36)<sup>4</sup></b>                                                  | 0.06 (-0.09, 0.20)                                                                    | 0.99 (0.96, 1.02)                                         |
| <b>Multivariable adjusted model<sup>2</sup></b> |                                                                             |                                                                     |                                                                   |                                                                                       |                                                                                       |                                                           |
| Total protein intake (g) <sup>3</sup>           | 0.02 (-0.05, 0.10)                                                          | <b>-0.02 (-0.05, -0.004)<sup>4</sup></b>                            | -0.26 (-0.64, 0.12)                                               | <b>0.08 (0.01, 0.15)<sup>4</sup></b>                                                  | 0.07 (-0.001, 0.14)                                                                   | 1.03 (0.61, 1.73)                                         |
| Animal protein intake (g) <sup>3</sup>          | 0.03 (-0.05, 0.10)                                                          | -0.02 (-0.05, 0.002)                                                | -0.29 (-0.68, 0.09)                                               | <b>0.07 (0.002, 0.15)<sup>4</sup></b>                                                 | <b>0.07 (0.002, 0.14)<sup>4</sup></b>                                                 | 1.00 (0.98, 1.01)                                         |
| Vegetable protein intake (g) <sup>3</sup>       | -0.05 (-0.22, 0.11)                                                         | -0.04 (-0.09, 0.01)                                                 | 0.09 (-0.74, 0.93)                                                | 0.10 (-0.05, 0.26)                                                                    | 0.02 (-0.14, 0.17)                                                                    | 0.97 (0.94, 1.01)                                         |

Values are based on multivariable linear or logistic regression models and reflect differences or odds ratios and 95% confidence intervals in kidney volume and function measures for maternal protein intake. Basic model<sup>1</sup> is adjusted for child's sex and age at 6 y visit. Multivariable adjusted model<sup>2</sup> is adjusted for child's sex, age at 6 y visit, maternal characteristics (age, body mass index before pregnancy, weight gain during pregnancy, gestational age at intake), maternal lifestyle (alcohol consumption, smoking during pregnancy, folic acid intake during pregnancy), socio-demographic factors (education), pre-pregnancy comorbidities, and child characteristics (breastfeeding, birth weight adjusted for gestational age, body surface area, and screen time at the age of 6y). Models with animal protein intake were additionally adjusted for vegetable protein intake and vice versa. <sup>3</sup> Protein intakes are energy-adjusted using the nutrient residual method. <sup>4</sup>p < 0.05.

Abbreviations: eGFR<sub>creat</sub>, estimated glomerular filtration rate based on creatinine levels, eGFR<sub>cyst C</sub>, estimated glomerular filtration rate based on cystatin C levels.
